# Supplementary material for: Modulation of biliverdin dynamics and spectral properties by Sandercyanin
Source: Royal Society of Chemistry journal article supplement (doi:10.1039/d2ra02880h), 2022-01-01
Supplement: d2ra02880h1.pdf [file d2ra02880h1.pdf]

## Modulation of biliverdin dynamics and spectral properties by Sandercyanin

Swagatha Ghosh<sup>a,b,\*</sup>, Sayan Mondal<sup>c</sup>, Keerti Yadav<sup>a,d</sup>, Shantanu Aggarwal<sup>c</sup>, Wayne F. Schaefer<sup>e</sup>, Chandrabhas Narayana<sup>c</sup>, Ramaswamy Subramanian<sup>a,f,\*</sup>

<sup>a</sup> Institute for Stem Cell Science and Regenerative Medicine, Bangalore, India 560065

<sup>b</sup> Department of Chemistry and Molecular Biology, University of Gothenburg, Medicinaregatan 9C, 40530 Gothenburg, Sweden

<sup>c</sup> Chemistry and Physics of Materials Unit, Jawaharlal Nehru Centre for Advanced Scientific Research, Bangalore 560064, Karnataka, India

<sup>d</sup> Manipal Academy of Higher education, Manipal University, Madhav Nagar, India 576104

<sup>e</sup> Department of Biological Sciences, University of Wisconsin at Milwaukee, Washington County, West Bend, WI 53095, USA

<sup>f</sup> Department of Biological Sciences and Weldon School of Biomedical Engineering, Purdue University, West Lafayette, IN 47907, USA

**Table S1. X-ray crystallographic data collection and refinement statistics of monomeric and tetrameric variants of SFP.**

| <b>Crystal</b>                          | <b>V71E -BV<br/>(monomer)</b> | <b>L135E -BV<br/>(monomer)</b> | <b>Y142A-BV<br/>(tetramer)</b> |
|-----------------------------------------|-------------------------------|--------------------------------|--------------------------------|
| <b>PDB ID</b>                           | <b>7O2Y</b>                   | <b>7O3K</b>                    | <b>7YX1</b>                    |
| <b>Data collection</b>                  | ID23-2, ESRF                  | BM14, ESRF                     | ID30A-1, ESRF                  |
| <b>Space group</b>                      | P4 <sub>1</sub>               | P4 <sub>1</sub>                | P6 <sub>3</sub> 22             |
| <b>Unit cell dimensions</b>             | 38.5 38.5 117.6               | 39.7 39.7 118.9                | 161.3 161.3 82.2               |
| <b>Resolution range (Å<sup>o</sup>)</b> | 36.56 - 2.5 (2.59<br>- 2.5)   | 39.65 - 2.75 (2.85 -<br>2.75)  | 46.57 - 2.65<br>(2.78 - 2.65)  |
| <b>Total reflections</b>                | 41927 (3399)                  | 16228                          | 125211                         |
| <b>Unique reflections</b>               | 6126 (685)                    | 4795 (703)                     | 18721 (1830)                   |
| <b>Multiplicity</b>                     | 6.8                           | 3.4                            | 6.7                            |
| <b>Completeness (%)</b>                 | 99.70 (99.35)                 | 99.2 (98.9)                    | 99.5 (99.5)                    |
| <b>Mean I/sigma(I)</b>                  | 10.4                          | 9.0                            | 5.1                            |
| <b>Rpim</b>                             | 0.05(0.24)                    | 0.07(0.35)                     | 0.14(0.26)                     |
| <b>Wilson B-factor</b>                  | 36.55                         | 43.39                          | 14.5                           |
| <b>R-factor</b>                         | 0.1732                        | 0.2313                         | 0.2296                         |
| <b>R-free</b>                           | 0.2535                        | 0.2505                         | 0.2759                         |
| <b>Number of atoms:</b>                 |                               |                                |                                |
| Macromolecules                          | 1281                          | 1271                           | 2580                           |
| Ligands                                 | 43                            | 43                             | 86                             |
| Water                                   | 51                            | 15                             | 122                            |
| <b>Protein residues</b>                 | 166                           | 166                            | 338                            |

|                                 |       |       |       |
|---------------------------------|-------|-------|-------|
| <b>RMS(bonds)</b>               | 0.014 | 0.013 | 0.010 |
| <b>RMS(angles)</b>              | 1.95  | 1.96  | 1.35  |
| <b>Ramachandran favored (%)</b> | 95.12 | 90.24 | 97.31 |
| <b>Clashscore</b>               | 6.17  | 12.05 | 6.69  |
| <b>Average B-factor:</b>        | 40.55 | 40.53 | 20.33 |
| Macromolecules                  | 40.63 | 40.44 | 20.48 |
| Solvent                         | 39.87 | 39.14 | 15.54 |

(Statistics for the highest-resolution shell are shown in parentheses)

### Supplementary Figure S1

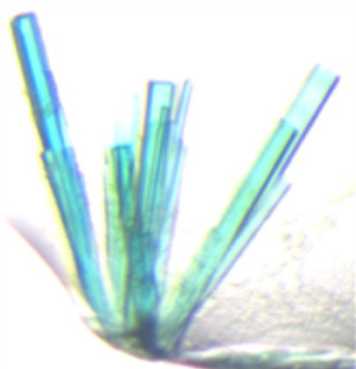

**BV- bound Val-71-Glu**  
11mg/mL  
0.2M calcium chloride dihydrate,  
20% (w/v) PEG 3350, pH 5.1

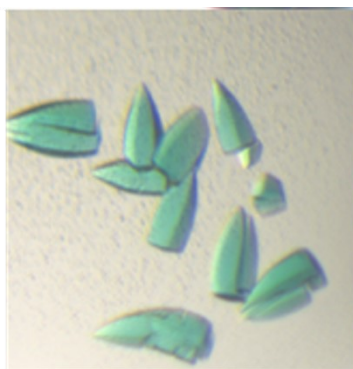

**BV- bound Leu-135-Glu**  
26mg/mL  
10% (w/v) PEG 1000,  
10% (w/v) PEG 8000

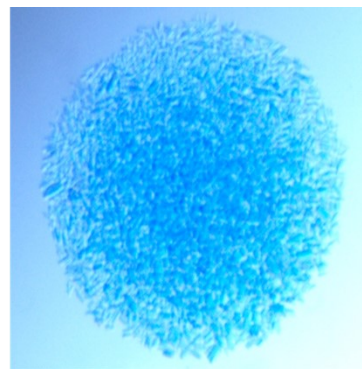

**BV- bound Tyr-142-Ala**  
9mg/ml;  
0.1M Bis-Tris pH 5.5  
3M NaCl

**Supplementary Figure S1:** Crystals and crystallization conditions of SFP variants in complex with BV. The monomeric variants did not show the same dark blue color as the tetrameric variants. V71E and L135E were monomeric., while Y142A is tetrameric.

**Supplementary Figure S2**

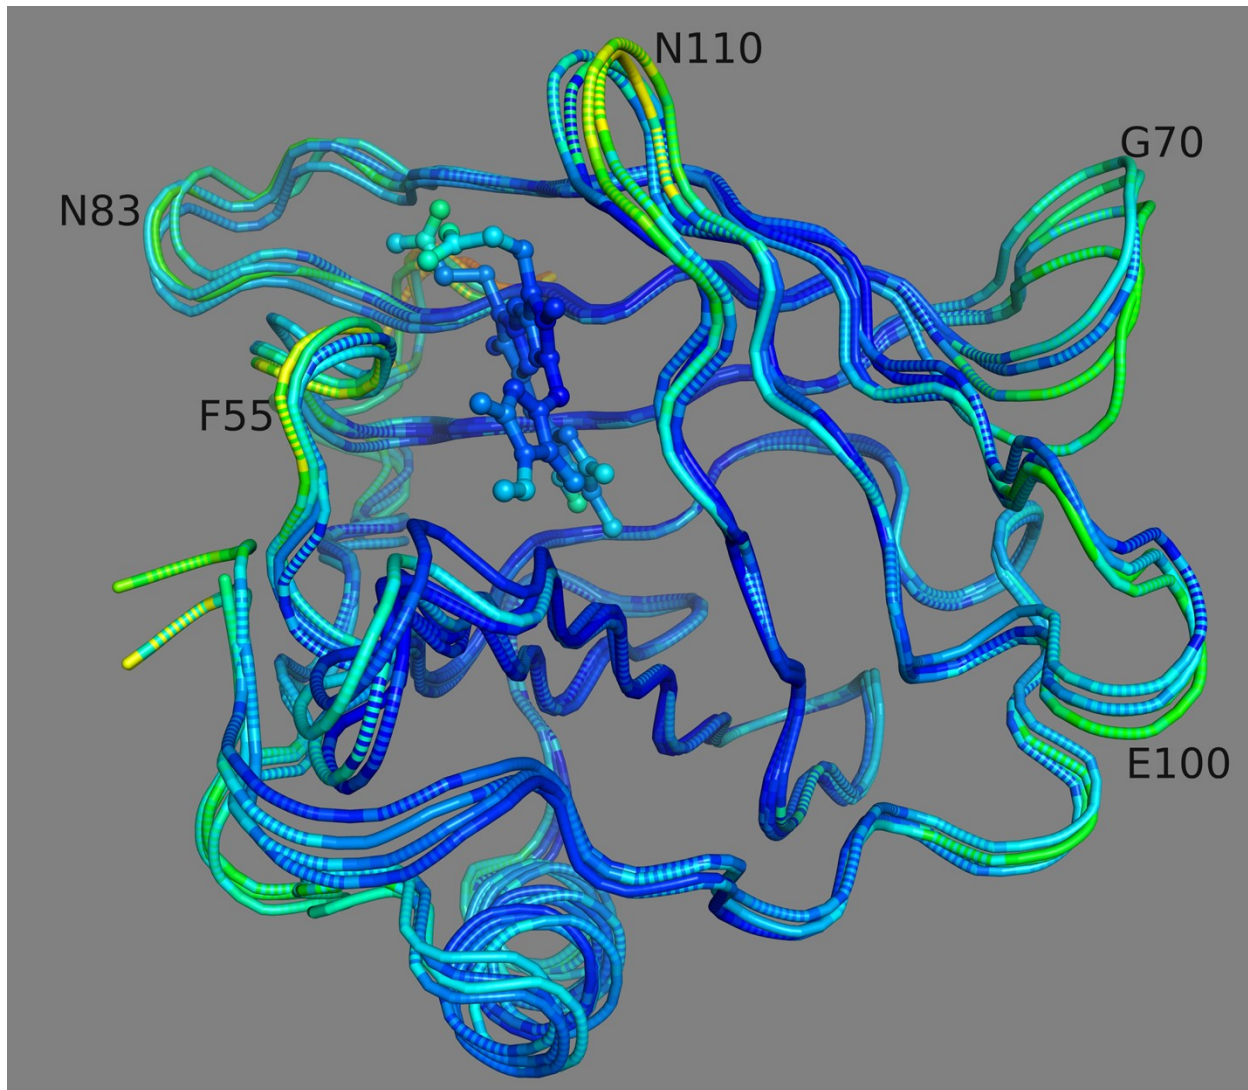

**Supplementary Figure S2:** Ribbon representation of the superposed structures of wild-type, V71E, L135E and Y142A. The overall structures are the same. The colors of the structures go from blue to red based on B-factor (lower B – blue). There are changes in the loop regions. Biliverdin (BV) binds at the entrance of the binding pocket. In the wild-type tetrameric structure the entrance to the barrel is closed by the neighboring subunit as seen in Figure 1 of the main manuscript. The loops of the monomeric variants are more flexible compared to the loops of the wild-type of Y142A. The BV position of the wild type structure (PDBID 5EZ2) is shown.

### Supplementary Figure S3

(A)

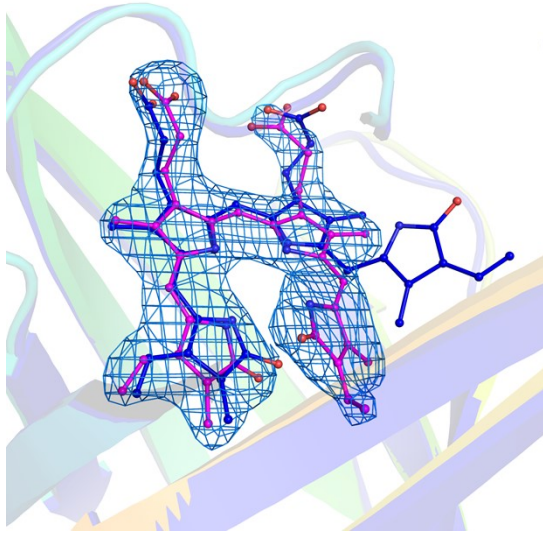

(B)

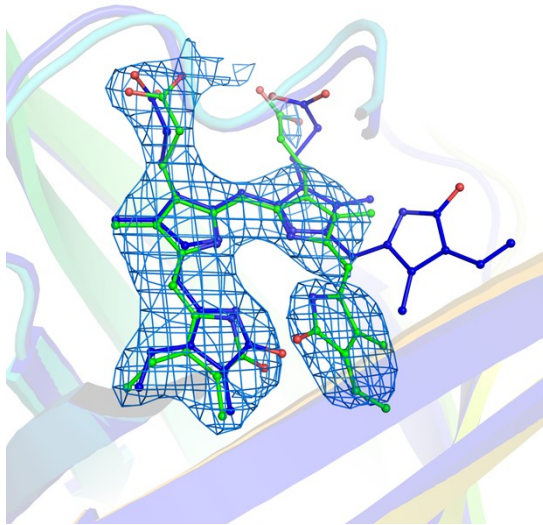

**Supplementary Figure 3.** BV modelled in the binding pocket of (A) V71E (magenta) and (B) L135E are represented along with 2Fo-Fc maps (contoured at  $1\sigma$ ). The maps clearly show a rotated D-ring in the monomeric variants compared to the wild-type BV (blue).

## Supplementary Figure S4

(A)

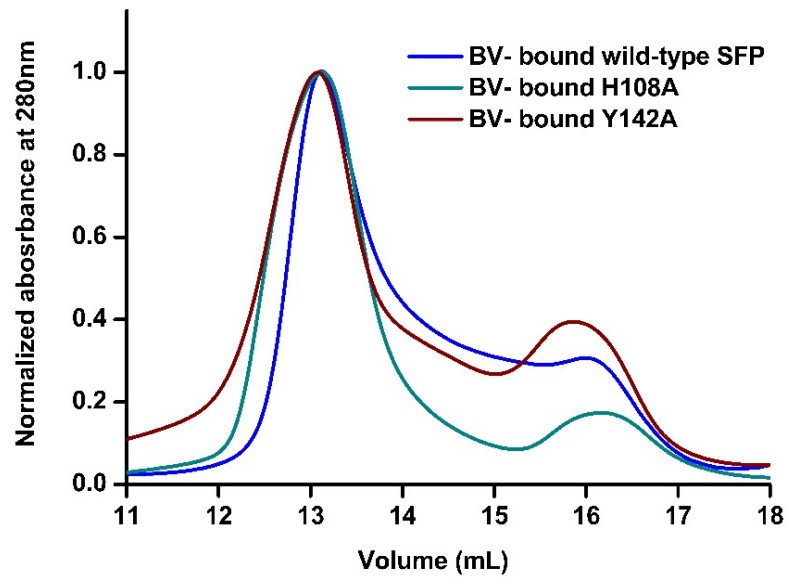

(B)

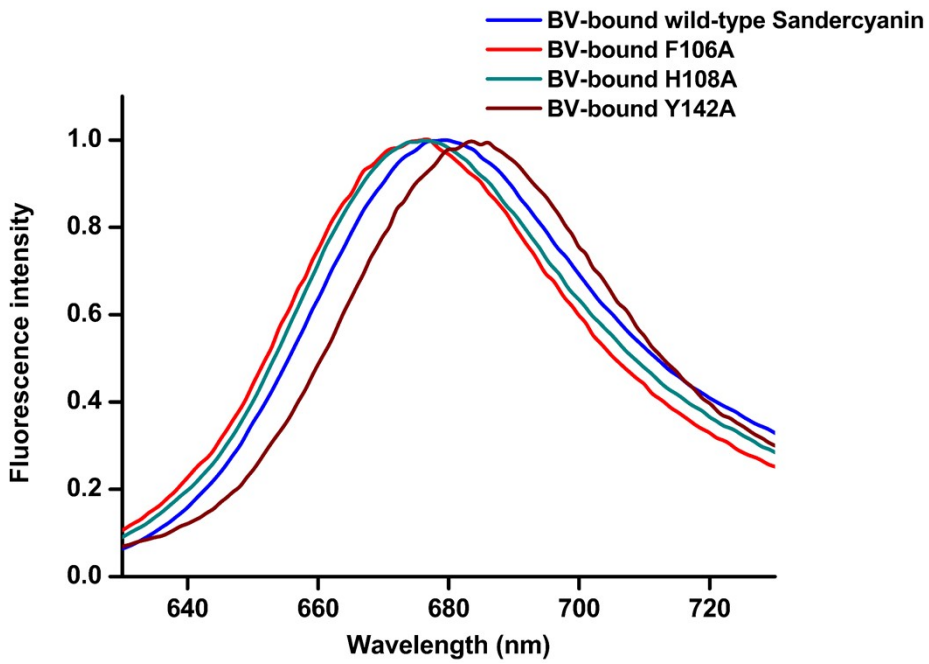

(C)

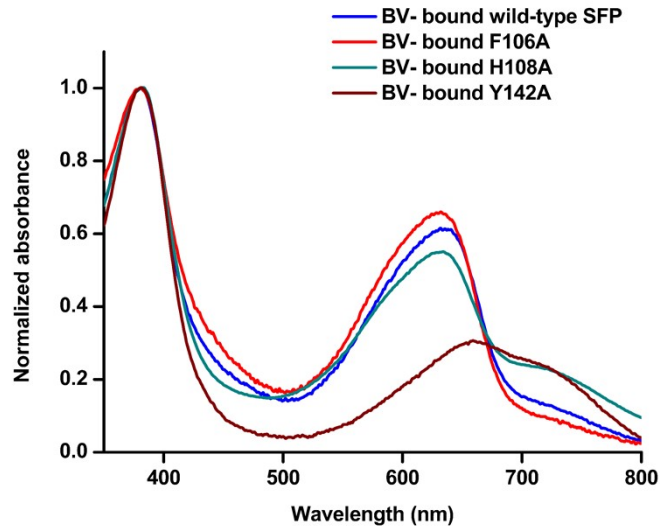

**Supplementary Figure 4.** (A) Size- exclusion chromatography (SEC) profiles, (B) The Fluorescence emission at excitation 380 nm and (B) absorbance spectra of F106A (red), H108A (deep cyan), Y142A (brown) compared to the wild-type SFP (blue). They have been normalized to 1.0 at the maximum value. Single mutations in the BV-binding site show variation in the spectral properties of Sander cyanin. For SEC, BV- bound solutions of wild-type protein, H108A and Y142A, normalized for the peak corresponding to tetrameric peak at 13.4 mL. The monomeric fractions (~16 mL) are contributed from apo protein. Since BV drives oligomerization in SFP (with apo- protein purely monomeric in solution), a change in concentration of the monomeric fraction (~16mL) among different variants is likely due to difference in the concentration of BV added during purification. F106A has a similar profile (data not shown here) to the wild-type and other tetrameric variants of SFP.

**Table S2. Normal mode assignment of resonance Raman bands of free BV, BV-bound wild-type SFP and Y142A-BV complex.**

| Free BV                                                           |                                                                   |                                                                   |                                                                  | SFP-BV complex                                             |                                                            |                                                            |                                                            | Assignment                                                                          | Localization of normal mode |
|-------------------------------------------------------------------|-------------------------------------------------------------------|-------------------------------------------------------------------|------------------------------------------------------------------|------------------------------------------------------------|------------------------------------------------------------|------------------------------------------------------------|------------------------------------------------------------|-------------------------------------------------------------------------------------|-----------------------------|
| RR,<br>$\lambda_{\text{exc}} =$<br>405 nm<br><br>cm <sup>-1</sup> | RR,<br>$\lambda_{\text{exc}} =$<br>532 nm<br><br>cm <sup>-1</sup> | Raman,<br>Soln.<br>1064 nm <sup>[1]</sup><br><br>cm <sup>-1</sup> | SERS,<br>Soln.,<br>514 nm <sup>[2]</sup><br><br>cm <sup>-1</sup> | Wild type                                                  |                                                            | Y142A mutant                                               |                                                            |                                                                                     |                             |
|                                                                   |                                                                   |                                                                   |                                                                  | $\lambda_{\text{exc}} =$<br>405 nm<br><br>cm <sup>-1</sup> | $\lambda_{\text{exc}} =$<br>532 nm<br><br>cm <sup>-1</sup> | $\lambda_{\text{exc}} =$<br>405 nm<br><br>cm <sup>-1</sup> | $\lambda_{\text{exc}} =$<br>532 nm<br><br>cm <sup>-1</sup> |                                                                                     |                             |
| 1699, w                                                           | 1696, vw                                                          | 1699                                                              | -                                                                | 1695, w                                                    | 1695, m                                                    | 1699, w                                                    | 1693, vw                                                   | C=O str.                                                                            | loc., A-ring, D-ring        |
| -                                                                 | -                                                                 | -                                                                 | -                                                                | -                                                          | -                                                          | -                                                          | -                                                          | C-C str. ring + C <sub>4</sub> =C <sub>5</sub> str.,                                | loc., A-ring                |
| 1636, sh, m                                                       | 1634, sh, m                                                       | -                                                                 | -                                                                | 1646, sh, w                                                | 1647, sh                                                   | 1644, sh, m                                                | 1648, w                                                    | C-C str. ring + C <sub>15</sub> =C <sub>16</sub> str. + C-C str. CH-CH <sub>2</sub> | loc., D-ring                |
| 1616, vs                                                          | 1618, sh, s                                                       | -                                                                 | 1604                                                             | 1625, vs                                                   | 1625, vs                                                   | 1620, vs                                                   | 1625, m                                                    | C-C str. ring + C <sub>15</sub> =C <sub>16</sub> str.                               | loc., D-ring                |
| -                                                                 | -                                                                 | -                                                                 | -                                                                | -                                                          | -                                                          | -                                                          | -                                                          | C-C str. ring + C <sub>9</sub> =C <sub>10</sub> str.                                | loc., A-ring, B-ring        |
| 1588, sh, s                                                       | 1591                                                              | 1593                                                              | -                                                                | 1596, sh, m                                                | 1596, m                                                    | 1591, sh, m                                                | 1597, vw                                                   | C-C str. ring + C <sub>9</sub> =C <sub>10</sub> -C <sub>11</sub> str.               | loc., A-ring, B-ring        |
| -                                                                 | -                                                                 | -                                                                 | -                                                                | -                                                          | -                                                          | -                                                          | -                                                          | C-C str. ring + C-C str. CH-CH <sub>2</sub>                                         | loc., D-ring                |
| 1528, w                                                           | 1528, w                                                           | -                                                                 | 1544                                                             | 1538, w                                                    | 1538, m                                                    | 1537, vw                                                   | 1539, vw                                                   | in-plane NH be., ring breath.                                                       | deloc.                      |
| 1464, vw                                                          | 1467                                                              | 1470                                                              | 1468                                                             | 1468, m                                                    | 1477, m                                                    | 1471, w                                                    | 1471, m                                                    | C-C str. aliph. + C-N str. ring + CH <sub>3</sub> def.                              | loc., C-ring                |
| 1432, w                                                           | 1434                                                              | -                                                                 | -                                                                | -                                                          | 1440, m                                                    | 1439, vvvw                                                 | 1440, vvw                                                  | -                                                                                   | -                           |
| -                                                                 | -                                                                 | -                                                                 | -                                                                | 1406, vvw                                                  | 1406, m                                                    | -                                                          | 1405, vw                                                   | CH <sub>3</sub> def. + CH be. + ring breath.                                        | loc., C-ring, D-ring        |
| 1384, vw                                                          | 1386                                                              | 1384                                                              | 1379                                                             | -                                                          | 1387, m                                                    | 1386, vvw                                                  | 1388, vw                                                   | CH <sub>3</sub> def. + CH be. + C-C str. ring. + NH be.                             | loc., A-ring                |
| 1353, w                                                           | 1352                                                              | -                                                                 | 1352                                                             | 1350, vw                                                   | 1355, m                                                    | 1353, m                                                    | 1356, vvw                                                  | CH <sub>3</sub> def. + C-C str. ring + C-C str. aliph.                              | loc., A-ring, B-ring        |
| 1322, w                                                           | 1321, m, sh                                                       | -                                                                 | -                                                                | -                                                          | 1327, sh, w                                                | 1326, m                                                    | 1327, m                                                    | CH be. + CH <sub>2</sub> wag. + NH be.                                              | deloc.                      |
| 1301, vvw                                                         | 1302, vs                                                          | 1301                                                              | 1300                                                             | 1301, vw                                                   | 1303, s                                                    | 1302, vvw                                                  | 1302, m                                                    | NH be. + C-N str. ring + ring breath.                                               | deloc.                      |
| -                                                                 | -                                                                 | -                                                                 | -                                                                | -                                                          | 1286, s                                                    | -                                                          | 1285, m                                                    | NH be. + CH be.                                                                     | deloc.                      |
| 1260, sh, m                                                       | 1262, vs                                                          | -                                                                 | 1260                                                             | 1263, m                                                    | 1263, s                                                    | 1265, m, sh                                                | 1263, m                                                    | NH be. + ring breath. + CH be.                                                      | loc., C-ring, D-ring        |
| 1239, m, sh                                                       | 1244, m, sh                                                       | 1248                                                              | -                                                                | 1250, sh, vvw                                              | -                                                          | 1248, s                                                    | 1244, vvw                                                  | NH be. + CH be. + CH <sub>2</sub> wag.                                              | deloc.                      |
| 1224, w, sh                                                       | 1226, m, sh                                                       | -                                                                 | -                                                                | 1234, sh, vw                                               | 1236, sh, vvw                                              | 1232, sh, vw                                               | -                                                          | NH be. + CH <sub>2</sub> wag.                                                       | deloc                       |
| -                                                                 | -                                                                 | 1193                                                              | 1161                                                             | 1194, w                                                    | -                                                          | 1188, w                                                    | 1189, vvw                                                  | ring breath. + CH <sub>2</sub> wag. + C-C str. aliph.                               | loc., D-ring                |
| 1168, w                                                           | 1170, w                                                           | -                                                                 | -                                                                | -                                                          | 1168, w                                                    | 1174                                                       | -                                                          | ring breath. + CH <sub>2</sub> wag.                                                 | loc., C-ring                |
| 1139, vvw                                                         | 1138, vvw                                                         | -                                                                 | -                                                                | -                                                          | 1141, m                                                    | -                                                          | 1143, vvw                                                  | ring breath. + CH be.                                                               | loc., A-ring                |
| 1118, vw                                                          | 1120, vvw                                                         | -                                                                 | -                                                                | 1118, m                                                    | 1114, vw                                                   | 1118, m                                                    | 1117, vvw                                                  | NH be. + ring breath. + CH be. + CH <sub>3</sub> def.                               | deloc.                      |
| -                                                                 | 1094, w                                                           | 1095                                                              | 1085                                                             | 1097, sh, vvw                                              | 1099, m                                                    | 1098, vvw                                                  | 1099, m                                                    | C-C str. + C-N str. + NH be. + CH be.                                               | loc., D-ring                |
| -                                                                 | -                                                                 | -                                                                 | -                                                                | -                                                          | 1068, sh                                                   | 1065, vw                                                   | 1068, m                                                    | CH <sub>2</sub> wag. + C-C str. aliph. + CH <sub>3</sub> def.                       | -                           |
| 1055, vvw                                                         | 1052, w                                                           | -                                                                 | 1042                                                             | 1059, w                                                    | 1052, m                                                    | 1057, m                                                    | 1052, m                                                    | CH <sub>3</sub> def.                                                                | -                           |



|             |             |     |     |                      |             |             |              |                                                                                                                                        |                          |
|-------------|-------------|-----|-----|----------------------|-------------|-------------|--------------|----------------------------------------------------------------------------------------------------------------------------------------|--------------------------|
| -           | -           | -   | -   | -                    | 1014, vw    | -           | -            | CH3 def.                                                                                                                               | -                        |
| -           | -           | -   | -   | -                    | 1004, w     | -           | -            | CH2 wag. + ring breath                                                                                                                 | loc., D-ring             |
| 992, w      | 996, vw, sh | -   | 993 | 996, w <sup>ss</sup> | 994, vvw    | 993, m      | -            | CH3 def. + ring breath.                                                                                                                | loc., A-ring             |
| 966, w      | 972, m      | 972 | -   | -                    | 968, m      | 966, m      | 968, vw      | CH2 wag. + ring breath. + CH3 def.                                                                                                     | loc., C-ring             |
| -           | -           | -   | -   | -                    | 956, sh     | -           | 958, sh, vvw | CH2 wag. + ring breath. + CH3 def.                                                                                                     | loc., B-ring             |
| 923, vvw    | 926, w      | -   | 936 | 931, w               | 933, m      | 935, vw     | 933, vw      | NH be. + ring breath. + CH be. + C <sub>9</sub> C <sub>10</sub> C <sub>11</sub> be. + C <sub>4</sub> C <sub>5</sub> C <sub>6</sub> be. | loc., B-ring             |
| -           | -           | -   | 909 | -                    | 919, vw     | -           | -            | Ring def. + C <sub>14</sub> C <sub>15</sub> C <sub>16</sub> be.                                                                        | deloc.                   |
| -           | -           | 885 | -   | -                    | 899, w      | -           | -            | ring str.                                                                                                                              | loc., A-ring             |
| not obs.    | 873, vvw    | -   | -   | 872, vvw             | 871, w      | 874, vvw    | 872, w       | CH wag.                                                                                                                                | -                        |
| -           | -           | 835 | 842 | 857, vw              | 853, w      | -           | 852, w       | HOOP, C <sub>15</sub> -H                                                                                                               | loc., C <sub>15</sub> -H |
| 825, w      | 828, vw     | -   | -   | -                    | 822, sh     | 835, sh, vw | -            | Out-of-plane ring def.                                                                                                                 | loc., D-ring             |
| -           | -           | 818 | -   | 811, m               | 809, m      | 820, m      | 821, w       | CH2 wag. + OCO be.                                                                                                                     | -                        |
| -           | -           | 790 | -   | -                    | 796, sh, vw | -           | -            | ring breath.                                                                                                                           | deloc.                   |
| -           | -           | 783 | -   | -                    | -           | -           | -            | Out-of-plane ring def.                                                                                                                 | loc., A-ring             |
| not obs.    | 761, vvw, * | 767 | -   | -                    | 769, vvw    | -           | 775, vvw     | Out-of-plane ring def. + CH2 wag. + C-C str.                                                                                           | loc., A-ring             |
| -           | -           | 722 | -   | -                    | 722, sh, vw | 717, sh, m  | 720, sh, vw  | Out-of-plane ring def. + CH2 wag. + ring str.                                                                                          | loc., B-ring, C-ring     |
| 708, w, *   | 710         | 717 | -   | -                    | 711, sh, w  | -           | 708, sh, w   | CH2 wag. + ring str                                                                                                                    | deloc.                   |
| -           | -           | 709 | -   | 705, m               | 700, sh     | -           | -            | out-of-plane NH be. + ring def.                                                                                                        | deloc.                   |
| -           | -           | 688 | -   | -                    | 686, m      | 688, m      | 684, vw      | in-plane ring def.                                                                                                                     | deloc.                   |
| 672, w, *   | 677         | 679 | 680 | 672, m               | 673, sh, w  | 672, sh, vw | -            | out-of-plane ring def.                                                                                                                 | deloc.                   |
| 647, sh, vw | 650, sh, vw | 655 | 642 | 654, sh, vw          | 655, m      | 653, vvw    | 654, sh, w   | In-plane ring def.                                                                                                                     | deloc.                   |
| not obs.    | 610, vvw    | 620 | -   | 610, vvw             | 612, w      | 609, vw     | 610, vw      | In-plane ring def. + out-of-plane NH be.                                                                                               | -                        |
| -           | -           | -   | -   | -                    | 581, sh, vw | 588, vw     | 590, vw      | In-plane ring def.                                                                                                                     | deloc.                   |
| 544, vvvw   | -           | -   | -   | 550, m               | -           | 550, vvw    | -            | ring str. + C-C str. aliph.                                                                                                            | loc., A-ring             |
| -           | 505, vvw    | 511 | -   | 510, vw              | -           | 508, m      | 510, sh, w   | ring def. + CH2 wag.                                                                                                                   | loc., B-ring + C-ring    |
| -           | -           | -   | 488 | 486, vw              | 488, vw     | 487, m      | 489, m       | out-of-plane ring. def.                                                                                                                | loc., A-ring + B-ring    |
| -           | -           | -   | -   | 463, vvw             | 464, sh, vw | 458, m      | -            | out-of-plane NH be.                                                                                                                    | loc., D-ring             |

[1] ref (1) ; [2] ref (2); abbreviations; s, strong; vs, very strong; m, medium; sh, shoulder; w, weak; vw, very weak; vvw, very very weak; Aliph., aliphatic; str., stretching; be., bending; def., out-of-plane deformation; as., asymmetric; wag., wagging or out-of-plane bend; loc., localized on a ring; breath., in-plane-breathing; <sup>ss</sup> 992 cm<sup>-1</sup> band corresponding to A-ring localized mode is used to normalize the 405 nm excited spectrum in Figure 5 panel A.

1. B. Knipp, *et al.*, Regioselective Deuteration and Resonance Raman Spectroscopic Characterization of Biliverdin and Phycocyanobilin. *Chem. - A Eur. J.* **3**, 363–367 (1997).
2. F. Celis, *et al.*, Surface-enhanced Raman scattering and theoretical study of the bilichromes biliverdin and bilirubin. *Spectrosc. Lett.* **49**, 336–342 (2016).
